# Evotuning protocols for Transformer-based variant effect prediction on multi-domain proteins

Hideki Yamaguchi<sup>1,2</sup> and Yutaka Saito<sup>1,2,3 \*</sup>

<sup>1</sup> Department of Computational Biology and Medical Sciences, Graduate School of Frontier Sciences, The University of Tokyo, Kashiwa, Chiba 277-8561, Japan.

<sup>2</sup> Artificial Intelligence Research Center, National Institute of Advanced Industrial Science and Technology (AIST), Koto-ku, Tokyo 135-0064, Japan.

<sup>3</sup> AIST-Waseda University Computational Bio Big-Data Open Innovation Laboratory (CBBD-OIL), Shinjuku-ku, Tokyo 169-8555, Japan.

\* Corresponding author. Tel: +81-3-3599-8063, E-mail: [yutaka.saito@aist.go.jp](mailto:yutaka.saito@aist.go.jp)

## Abstract

Accurate variant effect prediction has broad impacts on protein engineering. Recent machine learning approaches toward this end are based on representation learning, by which feature vectors are learned and generated from unlabeled sequences. However, it is unclear how to effectively learn evolutionary properties of an engineering target protein from homologous sequences, taking into account the protein's sequence-level structure called domain architecture (DA). Additionally, no optimal protocols are established for incorporating such properties into Transformer, the neural network well-known to perform the best in natural language processing research. This article proposes DA-aware evolutionary fine-tuning, or “evotuning”, protocols for Transformer-based variant effect prediction, considering various combinations of homology search, fine-tuning, and sequence vectorization strategies. We exhaustively evaluated our protocols on diverse proteins with different functions and DAs. The results indicated that our protocols achieved significantly better performances than previous DA-unaware ones. The visualizations of attention maps suggested that the structural information was incorporated by evotuning without direct supervision, possibly leading to better prediction accuracy.

**Keywords:** variant effect prediction, deep representation learning, Transformer, protein engineering, multi-domain proteins, sequence design

**Short descriptions of the authors:** Hideki Yamaguchi is a PhD candidate at the Department of Computational Biology and Medical Sciences, Graduate School of Frontier Sciences, The University of Tokyo. Yutaka Saito, PhD, is a senior researcher at Artificial Intelligence Research Center, National Institute of Advanced Industrial Science and Technology (AIST), and a visiting associate professor at The University of Tokyo.

**Availability:** [https://github.com/dlnp2/evotuning\\_protocols\\_for\\_transformers](https://github.com/dlnp2/evotuning_protocols_for_transformers)

# Introduction

A number of mutagenized proteins obtained by evolutionary engineering methods [1] have been reported to demonstrate highly improved functional activity in biomedical research: to name a few, fluorescence [2], signal transduction [3], or base editing capability [4]. It is well-known that many natural proteins have multiple domains, whose functions are determined by the serial arrangement of domains called domain architecture. For example, approximately 65% of eukaryotic proteins are considered to be multi-domain [5]. Furthermore, various industrially essential proteins, such as artificial antibodies [6] or CRISPR/Cas system-related proteins [7], have multiple domains. In protein engineering, a specific domain in a multi-domain protein is often mutagenized (e.g., [8-17]).

While useful, the mutagenesis experiments are often costly because multiple iterations of library construction and selection are necessary and they usually require target-specific human knowledge, the latter of which restricts the methods' generalizability to other proteins. In recent years, machine learning techniques are utilized to predict variant effects for tackling the challenges [18-20]. Among them, more attentions are paid to an approach called representation learning, in which features (or descriptors) are directly learned from primary sequences alone [21-23], inspired by natural language processing (NLP) research. The approach is promising because 1) it can exploit tens of millions to billions of sequences in public databases without the necessity for mutagenesis experiments or human expertise; 2) it automatically generates a "contextualized" feature for each amino acid in a given sequence explicitly considering interactions between residues in contrast to "static" features that take fixed values depending only on the type of amino acids [24-26].

In this direction, a representation learning protocol named "evotuning" (evolutionary fine-tuning) was proposed to incorporate evolutionary properties of proteins into LSTM [27] based representation learning models, whose performances were evaluated through variant effect prediction tasks [28]. In the protocol, the models were first trained using a large set of proteins across various families (pre-training). Next, homology search was performed with the full-length sequences of an engineering target protein as the queries to collect homologs. Then, the hit sequences were used for fine-tuning. Lastly, the full-length protein sequences were fed into the fine-tuned models to be vectorized (embedding). The evotuned models were demonstrated to perform significantly better than the pre-trained ones or models with static features.

This protocol, however, had been evaluated only on single-domain proteins. Therefore, it is still unclear whether the protocol is also successfully applied to proteins with multiple domains. For instance, let us consider that a full-length sequence of a multi-domain protein is used as a homology search query as conducted for a single-domain protein. This will result in sequences with partial homology to the query (i.e., aligned with some, but not all, of the multiple domains in the query). It is not obvious whether we should incorporate these sequences into fine-tuning to improve variant effect prediction performance. Thus, optimal protocols for multi-domain proteins need to be devised, particularly considering the issue of partial homology. Furthermore, to the best of our knowledge, none of the previous studies, including the aforementioned one, examined how such protocols affect the learned representations by Transformer [29], which is the neural network architecture known to achieve state-of-the-art performances in most NLP tasks [30, 31]. Also, Transformers explicitly calculate dependencies between residues known as attention map, which gives us clues to interpret how a prediction result for a specific variant is obtained.

Here we propose effective evotuning protocols for Transformer-based variant effect predictors, in which we explicitly consider domain architectures by combining homology search, fine-tuning, and embedding strategies. For evaluation, we systematically compared the models' performances trained with our protocols on diverse proteins with different functions and domain architectures. The results demonstrated that our protocols achieved significantly better prediction accuracy compared to the previous one. Moreover, the visualization of attention maps in Transformer suggested that evotuning can incorporate structural information of the proteins without direct supervision, possibly leading to improved performances.

# Materials and methods

## Experimental pipeline

We outline the 4-stage experimental pipeline used in this study (Figure 1): (a) pre-training. A Transformer model was trained from scratch with about 32 million primary sequences in Pfam [32] to capture general properties of proteins without reference to the domain annotation data; (b) fine-tuning the pre-trained model with homologous sequences for each target protein to incorporate evolutionary information specific to the target; (c) embedding each wild-type or mutagenized sequence through the fine-tuned model to obtain the vectorized feature representation of the whole sequence. These vectors were used in the next step; (d) training and evaluating variant effect predictors with the measured variant effects to model sequence-function relationships regarding the features as the surrogates of protein sequences. Note that a similar experimental pipeline was also used in the previous study to evaluate the performance of an LSTM-based representation learning model and its evotuning for single-domain proteins [28].

Because our primary interest was in elucidating how to utilize evolutionary information specific to a mutagenesis target protein effectively, the same pre-trained model was used in (a) for all experiments.

## Neural network implementation and training

We used a PyTorch [33] implementation of Transformer and a pre-trained weight reported in [21]. The model has 12 multi-head attention layers with 12 heads for each. Each fine-tuning was performed on 4 NVIDIA V100 GPUs using Adam optimizer [34] with learning rate 0.0001, batch size 256, automatic mixed precision [35] enabled, appropriate gradient accumulation steps for the whole batch to fit into the GPU memory, and masked language modeling [36] objective. For masked language modeling, the token corruption probabilities were set to be the same as in [36]. The special tokens ([CLS] and [SEP]) used in masked language modeling were appended to the first and the last positions of each input sequence, respectively. A learnable lookup table vectorized every amino acid before input into the neural network. Each training process was terminated when no improvement in validation loss was seen after ten epochs. We split the input sequences into training and validation sets by randomly selecting 90% and 10% sequences. Note that this splitting of training and validation sets was applied to homologous sequences used in fine-tuning (Figure 1b); the splitting in the evaluation of variant effect predictors (Figure 1d) was separately performed for variant sequences as described in the later section.

## Homology search

For fine-tuning, each homology search was performed with jackhmmer in HMMER software [37] against UniRef50 database [38]. The E-value threshold was set to 0.0001 for hit sequence inclusion (both --incE and --incdomE). Each run was stopped when converged or the iteration round reached 20. The sequences longer than 1.5x of the wild type sequence length were removed. In addition to this length-based filtering, other strategies were also considered to remove noisy sequences, which will be described in a later section.

## Domain annotation

For some of our protocols, we performed domain annotation on the hit sequences from homology search. We first run hmmscan in HMMER software using Pfam database as the reference. For each sequence, the outputs were parsed and filtered with the conditions [39]: 1) a domain candidate with an independent E-value larger than 0.0001 was removed; 2) if two domain candidates overlapped each other, the one with a smaller E-value was kept.

## Vector representation of protein sequences (embedding)

A sequence containing L amino acids was fed into a fine-tuned model to result in a matrix of the shape (L+2, 768), where 2 is for [CLS] and [SEP] tokens, and 768 is the embedding dimension. An average over the first dimension was taken to obtain a fixed-length vector representing the whole sequence, which was used as input to variant effect predictors in the later stage.

## Variant effect measurement data sourcing

We sourced the variant effect measurement data (i.e. protein sequence and measured value pairs) on ten different proteins [8-10] considering the following typical protein engineering scenarios: (A) the mutagenized protein has a single domain; (B) mutations are introduced to a specific domain in a multi-domain protein which is known to work independently on other domains; (C) similar to the scenario (B), but a specific domain is mutagenized which works cooperatively with other domains in a protein. In protein engineering, assay experiments to measure variant effects are often performed using a protein's subsequence rather than the full-length sequence. Thus, we also collected the information on the assayed subsequences used in the original studies. Each mutation was a single amino acid substitution. The measured values were normalized according to the prescription described in [8].

In Table 1, the collected proteins, the mutagenized regions, and the assayed subsequences are summarized. Here we classified the proteins into four categories considering their domain architecture and (non-)existence of intramolecular domain interactions. The single-domain proteins (TEM-1 [11] and APH(3')-II [12]) were classified into the category A; in the category B, the multi-domain proteins without intramolecular domain interactions were collected (ubiquitin [13], YAP65 [14], and E3 ligase [15]); the proteins known to have interacting domains fell into the category C (PSD95 [16, 40] and Pab1 [17,41,42]). Each of these protein categories corresponded to the respective protein engineering scenarios described above. We also prepared the category D for the proteins not considered to belong to the other categories: PTEN has two domains in physical contact with each other [43], but the mutations were introduced to both of the two interacting domains rather than one domain as in the category C [9]. HSP90 [44,45] and GAL4 [10,46] are known to work as homodimers, while the proteins in the category from A to C work as monomers. We here emphasize that the molecular functions of these proteins altered by the mutagenesis experiments are diverse: hydrolysis, substrate binding with distinct specificities, (de)phosphorylation, or functions related to protein degradation.

## Variant effect prediction

We used LASSO-LARS [47] implemented in scikit-learn Python package [48] as our variant effect predictor. LASSO-LARS is a sparse linear regression algorithm that is well-known for automatically selecting relevant features in high-dimensional space. In this study, the model was chosen to work well, particularly when the available number of measured variants is as small as a hundred or less. We note that the LASSO-LARS was also used in the previous study on evotuning for LSTM and single-domain proteins [28] for variant effect prediction. A separate predictor was trained for every combination of the selected protein and protocol. We examined two different training sizes (0.8 and 0.1) to emulate "high-N" and "low-N" scenarios, the latter of which is often the case in realistic protein engineering. We repeated the experiments using 32 different random seeds for splitting training/validation datasets to perform statistical tests for every combination of protein and protocol. The penalty coefficient on the L1 regularization term was determined by 10-fold nested cross-validation. The evaluation metric was Spearman's correlation coefficient. The performance differences between protocols were tested with the one-sided Wilcoxon test using SciPy [49] Python package (`scipy.stats.wilcoxon`).

## Construction of the proposed protocols

In this work, we propose to construct the protocols as the combination of the options in the following three parts (Figure 2):

- a) Homology search. We examined three options on what subsequence to use as a query for homology search. The first option was to use the full-length sequence of a protein (full search); the second one was to extract the mutagenized domain (domain search); the last was to extract the assayed subsequence used in each experiment. As described in Table 1, for some proteins, the assayed subsequences are identical to the full-length sequences or the mutagenized regions; in these cases, the corresponding homology search options become equivalent.
- b) Fine-tuning using the hit sequences. We examined whether to use full-length sequences as input to the neural network models (full training). When not using full-length sequences, n-grams ( $n=1,2,3$ ) were extracted regarding each domain as a unit (n-gram training). For example, in the 2-gram fine-tuning protocol, every two contiguous domain subsequences and the linker region in between was extracted from a full-length sequence. For n-gram generation, we performed domain annotation to each sequence before subsequence extraction. Here the annotation data were only used for n-gram generation, not for any supervision in the experimental pipeline.
- c) Vector representations (embeddings) of sequences. Similar to the homology search strategies (a), we tried to use the full length, mutagenized domain, and assayed subsequence of a protein for embedding. Same as explained in (a), the assay embedding coincided with the other embedding options in some cases.

In addition to these major three parts, we also considered several hit sequence filtering methods as post-processing of the sequence generation at the step (b) in our pipeline before fine-tuning: (1) removing sequences not including the mutagenized domain; (2) removing sequences including domains not in a query sequence; (3) the combination of (1) and (2). In Results section, we report the scores with the best performing filtering strategies, while the full results are reported in Supplementary Data 1.

We hypothesized the suitable domain architecture-aware protocol for each protein category from A to C (Table 1) to be as follows (summarized in Table 2): (A) for the protein category A, in which each protein has a single domain, we propose to combine full search, full training, and full embedding, which were the obvious choices; (B) for the protein category B, which was for the multi-domain proteins without intramolecular domain interactions, we hypothesized that to incorporate the evolutionary information in the mutagenized domain maximally the best protocol would be the combination of domain search, full training, and domain embedding; (C) for the protein category C, because it was considered crucial to capture the interplay between domains, we selected to perform full search and 3-gram training to cover the interacting sequence parts fully. On constructing these protocols, we assumed that the best embedding strategy would be the assay embedding because the evolutionary information in the assayed subsequences could directly influence the measured variant effects. Since the assay embedding is equivalent to the full embedding in the category A and domain embedding in the category B, respectively, we employed the corresponding embedding strategies for these categories. We assumed no specific protocols for the protein category D, which was prepared for the proteins not falling into other categories.

We tested these protocol hypotheses by evaluating the variant effect prediction performances on every possible combination of the homology search, fine-tuning, and embedding strategies including the proposed ones above. For comparison, we also set two other protocols: (1) “pre-training” protocol in which the pair of the pre-trained model and full embedding was used without homology search and fine-tuning; (2) “Full” protocol which is the combination of full search only with the length-based filtering (i.e. without filtering based on domain annotation), full training, and full embedding. Note that this protocol was the one evaluated in the previous study [28].

## Results and discussion

### Evotuning protocols substantially improve Transformer-based variant effect prediction accuracy



The evaluation results for the proposed protocols are summarized in Table 3. In almost all cases, the proposed protocols substantially outperformed the respective pre-trained counterparts. This is the first systematically demonstrated results that evotuning can improve Transformer-based representation learning on multi-domain as well as single-domain proteins. We also confirmed that most of the other protocols not described in Table 2 achieved significantly better accuracy than pre-training (Supplementary Data 1). Noticeably, the performance gains were more considerable when the training size was 0.1 compared to 0.8 for most examined proteins, with the maximum improvement of +0.40 in Spearman’s correlation coefficient for YAP65. These results indicate that the protocols effectively incorporate evolutionary information required for accurate variant effect prediction into the learned representations, especially in “low-N” scenarios where the measured values are too scarce to learn evolutionary properties only by supervised learning.

### **Feature analysis: evotuning can incorporate structural information without supervision**

An advantage of Transformer is its interpretability provided by attention maps. An attention map quantitatively describes how a residue in a protein affects another residue’s representation, which is internally calculated on embedding. To explore how the substantial performance improvement was realized by evotuning, we visualized the attention maps of YAP65 models as an example. Figure 3 shows the attention maps for the wild-type sequence obtained by the pre-training protocol and the protocol B. We compared these attention maps with the contact map separately computed from the tertiary structure of YAP65. The evotuned model’s attention map displays a contact map-like, roughly symmetric pattern with respect to the diagonal, which is in sharp contrast to the absence of such a pattern for the pre-trained model. This is quite surprising because an attention map is not symmetrized by construction and no explicit knowledge on the tertiary structure was input into the model on fine-tuning. Thus, the visualization suggests that the structural information was implicitly incorporated into the model from the evolutionarily related sequences in an unsupervised manner, possibly leading to the improved variant effect prediction accuracy.

### **Domain architecture-aware protocols achieve the best performances**

For single-domain proteins in the category A, the protocols Full and its modified counterpart A improved the prediction accuracies compared to the pre-training (Table 3), which was consistent with the previous study on LSTM [28]. Our results demonstrate that these protocols are also useful for representation learning based on Transformer.

Notably, for the multi-domain proteins in the categories B and C (Table 1), the respective protocols B and C achieved significantly better performances than the protocols Full and A in which evolutionary information was aggregated from the entire sequences across domains. For the proteins in the category B, where one of the multiple independently working domains was mutagenized, the protocol exploiting the mutagenized domain sequence only (i.e., protocol B) achieved the best scores: they were either the largest among all the protocols or at least larger than the protocol Full. By contrast, when the protocol C was applied to this protein category, several cases were observed to be merely comparable to the protocol Full (Ubiquitin with training size 0.1, YAP65 with 0.1, and E3 ligase with 0.8). These results indicate that the careful treatment of the domain architecture and the intramolecular domain interactions indeed lead to improved protein representations.

Next, for the category C proteins with cooperative domains, the protocol aiming to gather evolutionary information from sequences covering inter-domain interactions (i.e., protocol C) realized the best results. In a rare case (PSD95 with training size 0.8), the performance of the protocol B was comparable to the protocol C. A possible reason is that the mutagenesis assay was conducted for the isolated PDZ domain, not for the full length [40]. Nonetheless, in the remaining cases, the protocol C was better than the protocol B. The result again demonstrates the validity of our hypothesis that the representation learning of multi-domain proteins can be improved when explicitly considering different domain architectures of proteins. We also tried other training sizes (0.9, 0.5, 0.3, and 0.01) and found consistent results (Supplementary Data 2).

Lastly, no common superior protocol was confirmed for the protein category D in contrast to A, B, and C. Because the mutations were introduced to the whole sequence of PTEN [9], we only

conducted the protocols Full and A experiments not considering domain architectures, which resulted in the improved performances compared with the pre-training. This is consistent with the results for the protocols Full and A applied to the other proteins, indicating the partial effectiveness of evotuning. For HSP90 with training size 0.1, the protocols Full and A performed the best while it was comparable to the protocol C with training size 0.8. This performance mismatch between training sizes was also seen for GAL4 with the protocol B but not observed in the other proteins. We speculate that the difference stems from the distinct working mechanisms for these HSP90 and GAL4 (necessities for homodimer formation) from the other proteins.

### **Effectiveness of domain architecture-aware sequence filtering for evotuning**

The exhaustive evaluation verified that our domain architecture-aware sequence filtering strategies effectively improved prediction accuracy: by filtering, comparable or superior performances were achieved for all proteins examined (Supplementary Data 1). Our filtering method has the novelty in that it is designed for multi-domain proteins considering their domain architectures and mutagenized domains (Materials and methods). Recently, in a study [50], sequence filtering based on Levenshtein distance was performed to evotune LSTM-based representation models for variant effect prediction. However, it is unclear whether it can be successfully applied to multi-domain proteins because the study's evaluations were only performed for single-domain proteins (GFP and TEM-1).

## **Conclusion**

In this work, we proposed the domain architecture-aware protocols for Transformer representation learning of multi-domain proteins, combining homology search, fine-tuning, and sequence vectorization strategies. By systematically evaluating the variant effect prediction performances on ten different protein engineering tasks, we confirmed the effectiveness of our protocols: 1) they gave substantial performance gains compared with the pre-training, especially in “low-N” scenarios where the measured values are scarce; 2) the best-performing protocols were constructed by adequately considering the domain architecture and intramolecular domain interactions of the engineering target protein. While the evotuning protocols were demonstrated to be crucial for variant effect prediction, some protein engineering scenarios were not covered in this study. One example is protein engineering focusing on linker regions between domains [51], for which the protocols B and C cannot be directly applied. Another example is intramolecular interactions between distal domains (e.g., the interaction between N-terminus and C-terminus far apart by multiple domains), which can be regarded as an extension of the protein category C. The optimal evotuning protocols for these cases should be addressed in a future study.

## **Key points**

- In machine learning-guided protein engineering, it is crucial to incorporate evolutionary information specific to a target protein into the feature vectors. However, no protocols are established for Transformer-based variant effect prediction, in which features are learned and generated from unlabeled homologous sequences. To this end, this study proposes effective protocols combining homology search, fine-tuning, and sequence vectorization strategies for multi-domain proteins as well as single-domain ones.
- By systematic performance evaluation on various tasks, we demonstrated the protein representations obtained by the proposed protocols significantly outperformed the ones by pre-training as well as previous protocols. In particular, in “low-N” scenarios where the number of labeled training data available is small, the proposed protocols were shown to give substantial performance gains.
- We also confirmed that the best-performing protocols were constructed by adequately considering the engineered protein's domain architecture and intramolecular domain interactions. The visualization of the attention maps in Transformer given by the best protocol

suggested that structural information was implicitly captured by the model, which was a possible reason for the performance improvement. These results indicate that the proposed protocols are effective and indispensable for protein engineering.

## Acknowledgements

For neural network training, computational resource of AI Bridging Cloud Infrastructure (ABCI) provided by National Institute of Advanced Industrial Science and Technology (AIST) was used. Computations were partially performed on the NIG supercomputer at ROIS National Institute of Genetics.

## Funding

This work was supported by MEXT/JSPS KAKENHI (17H06410; 19K20409; 19K06502; 19K06077; 20H00315) and AMED grant (JP19am0401023; JP19ak0101122).

## References

- [1] Chen K, Arnold FH. Tuning the activity of an enzyme for unusual environments: sequential random mutagenesis of subtilisin E for catalysis in dimethylformamide. *Proc Natl Acad Sci U S A*. 1993;**90**:5618-22.
- [2] Pédelacq JD, Cabantous S, Tran T et.al.. Engineering and characterization of a superfolder green fluorescent protein. *Nat Biotechnol*. 2006;**24**:79-88.
- [3] Levin AM, Bates DL, Ring AM et.al.. Exploiting a natural conformational switch to engineer an interleukin-2 'superkine'. *Nature*. 2012;**484**:529-33.
- [4] Gaudelli NM, Komor AC, Rees HA et.al.. Programmable base editing of A•T to G•C in genomic DNA without DNA cleavage. *Nature*. 2017;**551**:464-471.
- [5] Ekman D, Björklund AK, Frey-Skött J et.al.. Multi-domain proteins in the three kingdoms of life: orphan domains and other unassigned regions. *J Mol Biol*. 2005;**348**:231-43.
- [6] Ahmad ZA, Yeap SK, Ali AM et.al.. scFv antibody: principles and clinical application. *Clin Dev Immunol*. 2012;**2012**:980250.
- [7] Makarova KS, Wolf YI, Iranzo et.al.. Evolutionary classification of CRISPR-Cas systems: a burst of class 2 and derived variants. *Nat Rev Microbiol*. 2020;**18**:67-83.
- [8] Gray VE, Hause RJ, Luebeck J et.al.. Quantitative Missense Variant Effect Prediction Using Large-Scale Mutagenesis Data. *Cell Syst*. 2018;**6**:116-124.e3.
- [9] Matreyek KA, Starita LM, Stephany JJ et.al.. Multiplex assessment of protein variant abundance by massively parallel sequencing. *Nat Genet*. 2018;**50**:874-882.
- [10] Kitzman JO, Starita LM, Lo RS et.al.. Massively parallel single-amino-acid mutagenesis. *Nat Methods*. 2015;**12**:203-6.
- [11] Firnberg E, Labonte JW, Gray JJ et.al.. A comprehensive, high-resolution map of a gene's fitness landscape. *Mol Biol Evol*. 2014;**31**:1581-92.
- [12] Melnikov A, Rogov P, Wang L et.al.. Comprehensive mutational scanning of a kinase in vivo reveals substrate-dependent fitness landscapes. *Nucleic Acids Res*. 2014;**42**:e112.
- [13] Roscoe BP, Bolon DN. Systematic exploration of ubiquitin sequence, E1 activation efficiency, and experimental fitness in yeast. *J Mol Biol*. 2014;**426**:2854-70.
- [14] Fowler DM, Araya CL, Fleishman SJ et.al.. High-resolution mapping of protein sequence-function relationships. *Nat Methods*. 2010;**7**:741-6.
- [15] Starita LM, Pruneda JN, Lo RS et.al.. Activity-enhancing mutations in an E3 ubiquitin ligase identified by high-throughput mutagenesis. *Proc Natl Acad Sci U S A*. 2013;**110**:E1263-72.
- [16] McLaughlin RN Jr, Poelwijk FJ, Raman A et.al.. The spatial architecture of protein function and adaptation. *Nature*. 2012;**491**:138-42.
- [17] Melamed D, Young DL, Gamble CE et.al.. Deep mutational scanning of an RRM domain of the *Saccharomyces cerevisiae* poly(A)-binding protein. *RNA*. 2013;**19**:1537-51.



- [18] Saito Y, Oikawa M, Nakazawa H et.al.. Machine-Learning-Guided Mutagenesis for Directed Evolution of Fluorescent Proteins. *ACS Synth Biol*. 2018;**7**:2014-2022.
- [19] Wu Z, Kan SBJ, Lewis RD et.al.. Machine learning-assisted directed protein evolution with combinatorial libraries. *Proc Natl Acad Sci U S A*. 2019;**116**:8852-8858.
- [20] Bedbrook CN, Yang KK, Robinson JE et.al.. Machine learning-guided channelrhodopsin engineering enables minimally invasive optogenetics. *Nat Methods*. 2019;**16**:1176-1184.
- [21] Rao R, Bhattacharya N, Thomas N et.al.. Evaluating Protein Transfer Learning with TAPE. In: 33rd Conference on Neural Information Processing Systems (NeurIPS 2019), Vancouver, Canada.
- [22] Elnaggar A, Heinzinger M, Dallago C et.al.. ProtTrans: Towards Cracking the Language of Life's Code Through Self-Supervised Deep Learning and High Performance Computing. *bioRxiv* doi: 10.1101/2020.07.12.199554.
- [23] Rives A, Meier J, Sercu T et.al.. Biological structure and function emerge from scaling unsupervised learning to 250 million protein sequences. *bioRxiv* doi: 10.1101/622803.
- [24] Kawashima S, Kanehisa M. AAindex: amino acid index database. *Nucleic Acids Res*. 2000;**28**:374.
- [25] Tian F, Zhou P, Li Z. T-scale as a novel vector of topological descriptors for amino acids and its application in QSARs of peptides. *J Mol Struct*. 2007;**830**:106–115.
- [26] Yang KK, Wu Z, Bedbrook CN et.al.. Learned protein embeddings for machine learning. *Bioinformatics*. 2018;**34**:2642-2648.
- [27] Krause B, Murray I, Renals S et.al.. Multiplicative LSTM for sequence modelling. In *ICLR Workshop*, 2017. 2, 6.
- [28] Alley EC, Khimulya G, Biswas S et.al.. Unified rational protein engineering with sequence-based deep representation learning. *Nat Methods*. 2019;**16**:1315-1322.
- [29] Vaswani A, Shazeer N, Parmar N et.al.. Attention is all you need. In *Advances in Neural Information Processing Systems*, 2017, 6000–6010.
- [30] Wang A, Singh A, Michael J et.al.. Glue: A multi-task benchmark and analysis platform for natural language understanding. In *Proceedings of the 2018 EMNLP Workshop BlackboxNLP: Analyzing and Interpreting Neural Networks for NLP*, pages 353–355.
- [31] Wang A, Pruksachatkun Y, Nangia N et.al.. SuperGLUE: A Stickier Benchmark for General-Purpose Language Understanding Systems. In: *33rd Conference on Neural Information Processing Systems (NeurIPS 2019)*, Vancouver, Canada.
- [32] El-Gebali S, Mistry J, Bateman A, Eddy SR et.al.. The Pfam protein families database in 2019. *Nucleic Acids Res*. 2019;**47**:D427-D432.
- [33] Paszke A, Gross S, Massa F et.al.. PyTorch: An Imperative Style, High-Performance Deep Learning Library. In *Advances in Neural Information Processing Systems*, 2019, 8024-8035.
- [34] Kingma D, Ba J. Adam: A method for stochastic optimization. In *ICLR*, 2015.
- [35] Micikevicius P, Narang S, Alben J. et.al.. Mixed Precision Training. Preprint at arxiv: <https://arxiv.org/abs/1710.03740> (2018).
- [36] Devlin J, Chang M-W, Lee K et.al.. BERT: Pre-training of Deep Bidirectional Transformers for Language Understanding. In: *Proceedings of the 2019 Conference of the North American Chapter of the Association for Computational Linguistics: Human Language Technologies*, Volume 1 (Long and Short Papers)
- [37] Eddy SR. Accelerated Profile HMM Searches. *PLoS Comput Biol*. 2011;**7**:e1002195.
- [38] Suzek BE, Wang Y, Huang H et.al.. UniRef clusters: a comprehensive and scalable alternative for improving sequence similarity searches. *Bioinformatics*. 2015;**31**:926-32.
- [39] Yu L, Tanwar DK, Penha EDS et.al.. Grammar of protein domain architectures. *Proc Natl Acad Sci U S A*. 2019;**116**:3636-3645.
- [40] Laursen L, Kliche J, Gianni S et.al.. Supertertiary protein structure affects an allosteric network. *Proc Natl Acad Sci U S A*. 2020;**117**:24294-24304.
- [41] Deo RC, Bonanno JB, Sonenberg N et.al.. Recognition of polyadenylate RNA by the poly(A)-binding protein. *Cell*. 1999;**98**:835-45.
- [42] Safaee N, Kozlov G, Noronha AM et.al.. Interdomain allostery promotes assembly of the poly(A) mRNA complex with PABP and eIF4G. *Mol Cell*. 2012;**48**:375-86.

- [43] Lee JO, Yang H, Georgescu MM et.al.. Crystal structure of the PTEN tumor suppressor: implications for its phosphoinositide phosphatase activity and membrane association. *Cell*. 1999;**99**:323-34.
- [44] Mishra P, Flynn JM, Starr TN et.al.. Systematic Mutant Analyses Elucidate General and Client-Specific Aspects of Hsp90 Function. *Cell Rep*. 2016;**15**:588-598.
- [45] Richter K, Muschler P, Hainzl O, et.al.. Coordinated ATP hydrolysis by the Hsp90 dimer. *J Biol Chem*. 2001 Sep 7;276(36):33689-96.
- [46] Hong M, Fitzgerald MX, Harper S, et.al. Structural basis for dimerization in DNA recognition by Gal4. *Structure*. 2008 Jul;16(7):1019-26.
- [47] Efron B, Hastie T, Johnstone I et.al.. Least angle regression. *Ann. Statist*. 2004;**32**:407-499.
- [48] Pedregosa F, Varoquaux G, Gramfort A et al.. Scikit-learn: machine learning in Python. *J Mach Learn Res* 2011;**12**:2825–30.
- [49] Virtanen P, Gommers R, Oliphant TE et.al.. SciPy 1.0: fundamental algorithms for scientific computing in Python. *Nat Methods*. 2020;**17**:261-272.
- [50] Biswas S, Khimulya G, Alley EC et.al.. Low-N protein engineering with data-efficient deep learning. *bioRxiv* doi: 10.1101/2020.01.23.917682.
- [51] Barilá D, Superti-Furga G. An intramolecular SH3-domain interaction regulates c-Abl activity. *Nat Genet*. 1998;**18**:280-2.

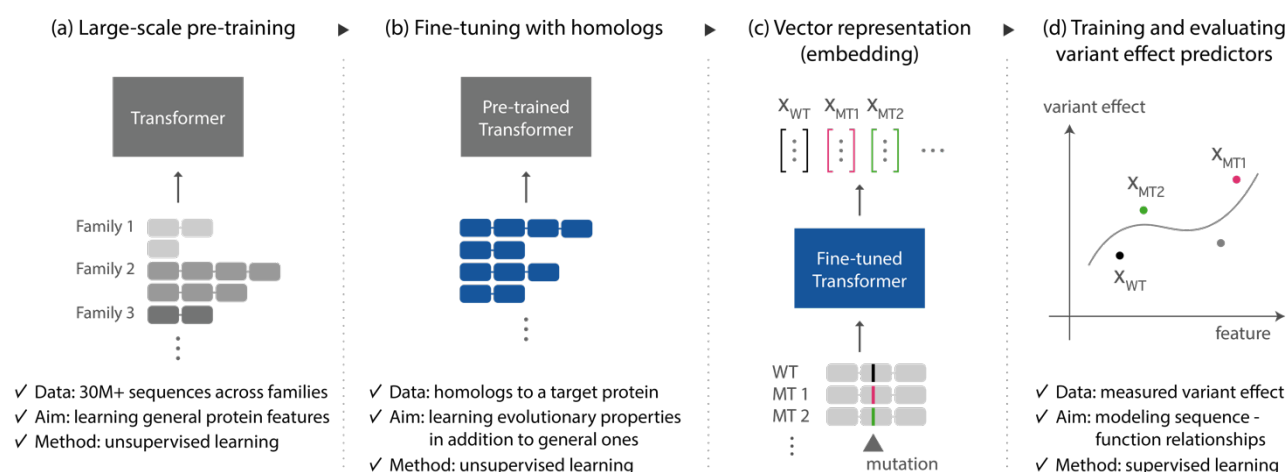

Fig. 1: Overview of our 4-stage pipeline for protein representation model training and evaluation. See the main text for the detail explanation of each step.

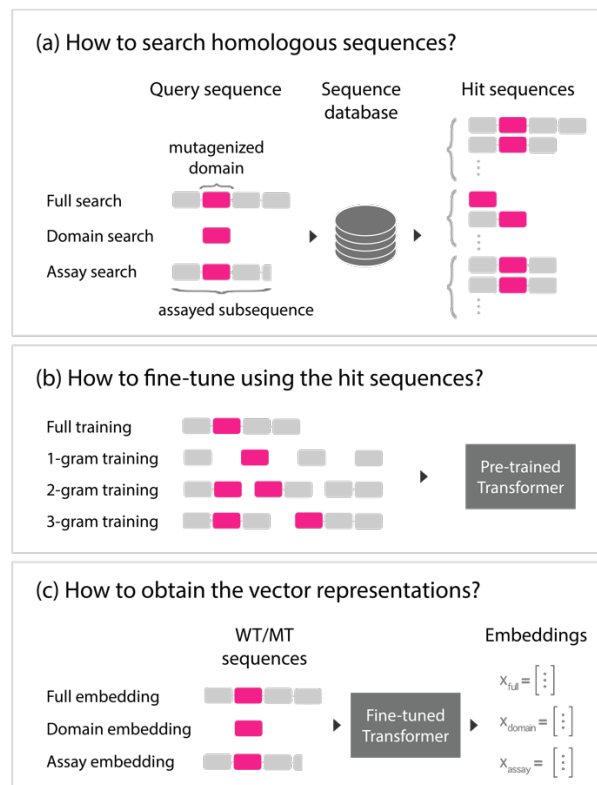

Figure 2. Schematic view of our domain architecture-aware protocols as combinations of homology search, fine-tuning and sequence embedding strategies. See the main text for the detail explanation of each strategy.

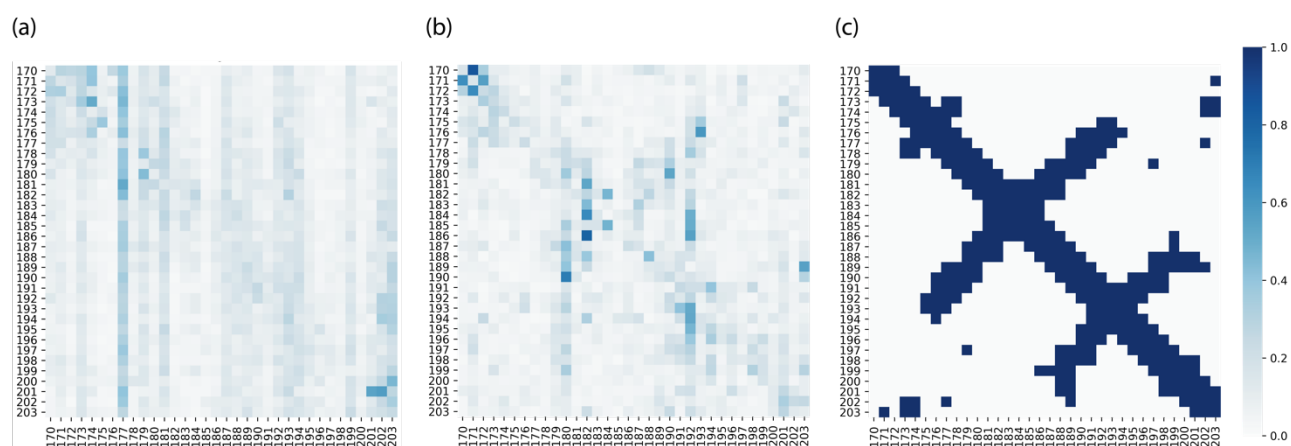

Figure 3. Comparison of YAP65 attention maps obtained by Transformer and the contact map computed from the tertiary structure. (a, b) attention maps obtained by the pre-training protocol (a) and the evotuning protocol B (b). (c) contact map computed from the tertiary structure (PDB: 1JMQ). The mutagenized region (positions from 170 to 203) is visualized. To obtain the attention maps, we computed the max-pooled values over all heads in the last layer. In (a), for comparison with (b), the attention map corresponding to the mutagenized region was extracted from the attention map of the full-length sequence obtained by full embedding, and normalized so that the sum of each row is one.



| Category | Protein    | Domain architecture                                       | Intramolecular domain interaction                                        | Mutagenized region | Assayed subsequence          | Number of variants | Function                      | UniProt ID |
|----------|------------|-----------------------------------------------------------|--------------------------------------------------------------------------|--------------------|------------------------------|--------------------|-------------------------------|------------|
| A        | TEM-1      | Single domain                                             | -                                                                        | Full length [11]   | Full length                  | 5,199              | Substrate hydrolysis          | P62593     |
| A        | APH(3')-II | Single domain                                             | -                                                                        | Full length [12]   | Full length                  | 5,301              | Phosphorylation               | P00552     |
| B        | Ubiquitin  | ubiquitin - ubiquitin - ubiquitin - ubiquitin - ubiquitin | -                                                                        | ubiquitin1 [13]    | ubiquitin1                   | 1,140              | Protein degradation           | P0CG63     |
| B        | YAP65      | WW - WW                                                   | -                                                                        | WW1 [14]           | WW1                          | 364                | Substrate binding             | P46937     |
| B        | E3 ligase  | Udf2P_core - U-BOX                                        | -                                                                        | U-BOX [15]         | U-BOX                        | 900                | Ubiquitin-protein conjugation | Q0ES00     |
| C        | PSD95      | PDZ - PDZ - PDZassoc - PDZ - SH3 - GK                     | Supramodule formed by PDZ3, SH3 and GK [40]                              | PDZ3 [16]          | PDZ3                         | 1,578              | Peptide binding               | P31016     |
| C        | Pab1       | RRM - RRM - RRM - RRM - PABP                              | Physical contact and allosteric regulation between RRM1 and RRM2 [41,42] | RRM2 [17]          | RRM1-RRM3 (1-343)            | 1,189              | poly-A binding                | P04147     |
| D        | PTEN       | DSPc - PTEN_C2                                            | Physical contact between DSPc and PTEN_C2 [43]                           | DSPc, PTEN_C2 [9]  | Full length                  | 4,112              | Dephosphorylation             | P60484     |
| D        | HSP90      | HATPase_c - HSP90                                         | (Works as homodimer [45])                                                | HATPase_c [44]     | Full length                  | 4,022              | Protein binding               | P02829     |
| D        | GAL4       | Zn_clus - Gal4_dimer - Fungal_trans                       | (Works as homodimer [46])                                                | Zn_clus [10]       | Zn_clus – Gal4_dimer (1-196) | 1,196              | DNA binding                   | P04386     |

Table 1. Summary of the examined proteins in this study. The domain architectures are based on Pfam [32]. In the “mutagenized region” column, the domain name followed by a number means its position in the domain architecture (e.g., PDZ3 in PSD95 means the third PDZ domain from the N-terminus). See the main text for the definition of the protein categories A-D.

| Protocol category | Protein category | Proteins                    | Homology search | Fine-tuning | Embedding                          |
|-------------------|------------------|-----------------------------|-----------------|-------------|------------------------------------|
| A                 | A                | TEM-1, APH(3')-II           | Full search     | Full length | Full embedding (assay embedding)   |
| B                 | B                | Ubiquitin, YAP65, E3 ligase | Domain search   | Full length | Domain embedding (assay embedding) |
| C                 | C                | PSD95, Pab1                 | Full search     | 3-gram      | Assay embedding                    |

Table 2. Summary of the proposed protocol for each protein category. The protocol categories B and C are the ones considering the domain architecture in multi-domain proteins. In the “Embedding” column, assay embedding in parentheses means the described option is equivalent to assay embedding.

| Protein category | Protein   | Protocols    |                  |                  |                                  |                                  |
|------------------|-----------|--------------|------------------|------------------|----------------------------------|----------------------------------|
|                  |           | Pre-training | Full [28]        | A                | B                                | C                                |
| A                | TEM-1     | 0.70<br>0.45 | 0.78*<br>0.64*   | 0.78*<br>0.64*   | -                                | -                                |
|                  |           | 0.67<br>0.38 | 0.68*<br>0.42*   | 0.68*<br>0.45**  | -                                | -                                |
| B                | Ubiquitin | 0.58<br>0.35 | 0.58<br>0.39*    | 0.60**<br>0.41** | 0.61**<br>0.43***                | 0.60**<br>0.40*                  |
|                  | YAP65     | 0.62<br>0.07 | 0.72*<br>0.32*   | 0.74*<br>0.39*   | <b>0.77***</b><br><b>0.47***</b> | 0.70*<br>0.40**                  |
|                  |           | 0.16<br>0.01 | 0.39*<br>0.15*   | 0.44**<br>0.17*  | <b>0.48***</b><br><b>0.25***</b> | 0.41*<br>0.21**                  |
| C                | PSD95     | 0.62<br>0.25 | 0.65*<br>0.40*   | 0.67**<br>0.47** | 0.69***<br>0.47**                | <b>0.69***</b><br><b>0.50***</b> |
|                  |           | 0.66<br>0.43 | 0.70*<br>0.52**  | 0.73**<br>0.56** | 0.71*<br>0.50**                  | <b>0.76***</b><br><b>0.59***</b> |
| D                | PTEN      | 0.54<br>0.29 | 0.62*<br>0.45*   | 0.62*<br>0.46*   | -                                | -                                |
|                  | HSP90     | 0.54<br>0.33 | 0.56*<br>0.43*** | 0.57*<br>0.43*   | 0.55<br>0.39*                    | 0.56*<br>0.41*                   |
|                  |           | 0.61<br>0.24 | 0.68*<br>0.46*   | 0.68*<br>0.46*   | 0.69***<br>0.48*                 | 0.62<br>0.31                     |

Table 3. Summary of variant effect prediction accuracy (Spearman's correlation coefficient). The upper and lower values in each cell are for training size 0.8 and 0.1, respectively. \*: significantly ( $p < 0.05$ ; one-sided Wilcoxon test) better than pre-training. \*\*: significantly better than pre-training and protocol "Full". \*\*\*: significantly better than B, C, and either "Full" or A. For the protocols B and C, the best performing protocols are shown in bold (i.e., the scores for both training sizes have \*\*\* marks).
